# Supplementary material for: Symptomatic Benign Prostatic Hyperplasia with Suppressed Epigenetic Regulator HOXB13 Shows a Lower Incidence of Prostate Cancer Development
Source: MDPI journal article supplement (doi:10.3390/cancers16010213), 2024-01-02
Supplement: s1 [file s1]

## Supplementary Figure S1.

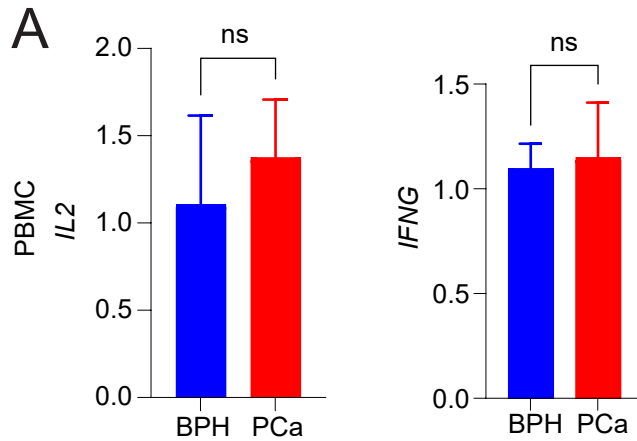

Supplementary Figure S1. Analysis of T cell activation markers in Peripheral Blood Mononuclear Cells (PBMCs) from BPH and PCa patients.

Total RNA was isolated from PBMCs purified from BPH and PCa patients (n=5 patients/cohort; in triplicate for each sample) and analyzed by qRT-PCR as described in materials and methods. Relative expression of IL-2 and IFN- $\gamma$  is shown. Actin was used as normalization control. ns: Not-significant.

**Supplementary Table S1: qRT-PCR primers**

| <b>Gene</b>     | <b>Sequence (5' - 3')</b> |                          |
|-----------------|---------------------------|--------------------------|
| <b>CD45</b>     | Forward Sequence          | CTTCAGTGGTCCCATTGTGGTG   |
|                 | Reverse Sequence          | CCACTTTGTTCTCGGCTTCCAG   |
| <b>IRF8</b>     | Forward Sequence          | AGGTCTTCGACACCAGCCAGTT   |
|                 | Reverse Sequence          | GCACGAGAATGAGTTTGGAGCG   |
| <b>HLA-DQA1</b> | Forward Sequence          | GCATTGTGGTGGGCACTGTCTT   |
|                 | Reverse Sequence          | TCTTCTGCTCCTGTAGATGGCG   |
| <b>HLA-DRB3</b> | Forward Sequence          | TTCCAGACCCTGGTGATGCTAG   |
|                 | Reverse Sequence          | GACTCCACTCAGCATCTTGCTC   |
| <b>SP110</b>    | Forward Sequence          | AGAAGACGCCTAGTACACCACG   |
|                 | Reverse Sequence          | GTTCCAGGTTGAGTCGTCTTTCC  |
| <b>SP140</b>    | Forward Sequence          | GCATGGCTGGAGCAGAATGAGA   |
|                 | Reverse Sequence          | CGTTCGCCTTCTTTTCACTGGAG  |
| <b>FOXA1</b>    | Forward Sequence          | GCAATACTCGCCTTACGGCTCT   |
|                 | Reverse Sequence          | GGGTCTGGAATACACACCTTGG   |
| <b>SIM2</b>     | Forward Sequence          | TGTCTTGGCGAAAAGGAACGCG   |
|                 | Reverse Sequence          | CCACAATCTGGTAGCAGGAGTC   |
| <b>ZAP70</b>    | Forward Sequence          | CACTACGCCAAGATCAGCGACT   |
|                 | Reverse Sequence          | GGCTGGAGAACTTGCGGAAGTT   |
| <b>ORM1</b>     | Forward Sequence          | CTGACAAGCCAGAGACGACCAA   |
|                 | Reverse Sequence          | TGCTTCTCCAGTGGCTCACACT   |
| <b>NKX3-1</b>   | Forward Sequence          | CGCAGAACGACCAGCTGAGCA    |
|                 | Reverse Sequence          | CCTGAAGTGTTTTCAAGTCCAAC  |
| <b>HOXB13</b>   | Forward Sequence          | ACAGAACCCACCAGGTCCCTTT   |
|                 | Reverse Sequence          | TACGGAATGCGTTTCTTGCGGC   |
| <b>AR</b>       | Forward Sequence          | ATGGTGAGCAGAGTGCCCTATC   |
|                 | Reverse Sequence          | ATGGTCCCTGGCAGTCTCCAA    |
| <b>PSA</b>      | Forward Sequence          | TGGGGACCACCTGCTACGCC     |
|                 | Reverse Sequence          | TCGGTGATCAGAATGACCCACGAG |
| <b>CD3D</b>     | Forward Sequence          | GTCATTGCCACTCTGCTCCTTG   |
|                 | Reverse Sequence          | CCTGGTCATTCTCAACAGAGC    |
| <b>IFNG</b>     | Forward Sequence          | GAGTGTGGAGACCATCAAGGAAG  |
|                 | Reverse Sequence          | TGCTTTGCGTTGGACATTCAAGTC |
| <b>IL-2</b>     | Forward Sequence          | AGAACTCAAACCTCTGGAGGAAG  |
|                 | Reverse Sequence          | GCTGTCTCATCAGCATATTCACAC |
| <b>CXCL9</b>    | Forward Sequence          | CTGTTCTGCATCAGCACCAAC    |
|                 | Reverse Sequence          | TGAACTCCATTCTTCAGTGTAGCA |
| <b>CXCL10</b>   | Forward Sequence          | GGTGAGAAGAGATGTCTGAATCC  |

|              |                  |                        |
|--------------|------------------|------------------------|
|              | Reverse Sequence | GTCCATCCTTGGAAGCACTGCA |
| <b>GAPDH</b> | Forward Sequence | TGCACCACCAACTGCTTAGC   |
|              | Reverse Sequence | GGCATGGACTGTGGTCATGAG  |
| <b>Actin</b> | Forward Sequence | CACCATTGGCAATGAGCGGTTC |
|              | Reverse Sequence | AGGTCTTTGCGGATGTCCACGT |
